# Supplementary material
Source: PubMed Central journal article supplement (PMC7611280)
Supplement: EMS128833-supplement-Supplementary_material.pdf [file EMS128833-supplement-Supplementary_material.pdf]

**Supplemental material for the manuscript entitled**

**“Cell death induced by cationic amphiphilic drugs depends on lysosomal Ca<sup>2+</sup> release and cyclic AMP”**

- Table S1, List of Resources
- Supplemental figures S1-S6 with legends

**Table S1. List of resources**

| Reagent / chemical                         | Source                   | Catalogue #; CAS #             |
|--------------------------------------------|--------------------------|--------------------------------|
| Acetonitrile, ≥99.8% ofr HPLC              | VWR                      | AXO145; 2114-00-3              |
| Acetonitrile, for LC-MS                    | VWR                      | BJLC015; 2114-00-3             |
| Astemizole                                 | Sigma Aldrich            | A2861; 68844-77-9              |
| ATP                                        | Sigma Aldrich            | A2383; 34369-07-8              |
| Bambuterol hydrochloride                   | Sigma Aldrich            | B8684; 81732-46-9              |
| BAPTA AM                                   | Thermo Fisher Scientific | B-6769; 126150-97-8            |
| Clarity™ Western ECL Substrate             | Bio-Rad                  | 170-5061; N/A (not applicable) |
| Dextran 10 kDa, Alexa Fluor® 594           | Thermo Fisher Scientific | D22913; N/A                    |
| Dextran, 10 kDa, pHrodo™ Green             | Thermo Fisher Scientific | P35368; N/A                    |
| Dextran 70 kDa, tetramethylrhodamine (TMR) | Thermo Fisher Scientific | D-1819; N/A                    |
| DIBAC4                                     | Thermo Fisher Scientific | B438; 70363-83-6               |
| Dibutryl cAMP sodium salt                  | Sigma Aldrich            | D0627; 16980-89-5              |
| DMSO                                       | VWR                      | VWRCN182, 67-68-5              |
| DPIC                                       | Sigma Aldrich            | D2926; 4673-26-1               |
| Ebastine                                   | Cayman Chemical          | 15372, 90729-43-4              |
| Fluo-4-AM                                  | Thermo Fisher Scientific | F14201, 273221-67-3            |
| Formoterol fumarate dihydrate              | Sigma Aldrich            | F9552; 183814-30-4             |
| Forskolin                                  | Sigma Aldrich            | 93049; 66575-29-9              |
| G418                                       | Life Technologies        | 11811-031, 108321-42-2         |
| Goat serum                                 | DAKO                     | X0907; N/A                     |
| Glycylphenylalanine2-naphthylamide (GPN)   | Santa Cruz               | sc-252858, 21438-66-4          |
| Hoechst 33258                              | Sigma Aldrich            | 861405; 23491-45-4             |
| Hoechst 33342                              | Sigma Aldrich            | B2261; 23491-52-3              |
| IBMX                                       | Sigma Aldrich            | I5879; 28822-58-4              |
| Lipofectamine® LTX with PLUS reagent       | Thermo Fisher Scientific | 15338100; N/A                  |
| Lipofectamine® RNAiMAX                     | Thermo Fisher Scientific | 13778075; N/A                  |
| LLoMe                                      | Santa Cruz               | SC-285992, 16889-14-8          |
| Loperamide hydrochloride                   | Alomone Labs             | L-100, 34552-83-5              |
| Loratadine                                 | Sigma Aldrich            | L9664, 79794-75-5              |
| LysoTracker® Green DND-26                  | Molecular Probes         | L-7526; N/A                    |
| LysoTracker® Red DND-99                    | Molecular Probes         | L-7528; N/A                    |
| MLSA-1                                     | Tocris                   | 4746, 332382-54-4              |
| Paraformaldehyde (PFA)                     | Ampliqon                 | 432.261.000, 30525-89-4        |
| Penfluridol                                | Sigma Aldrich            | P3371; 26864-56-2              |
| Phosphatase inhibitor cocktail             | Roche                    | 4906837001; N/A                |
| Prolong Gold Antifade mountant             | Life Technologies        | P36934; N/A                    |

| Propidium Iodide                       | Sigma Aldrich                                             | P4864; 25535-16-4              |
|----------------------------------------|-----------------------------------------------------------|--------------------------------|
| Protease inhibitor cocktail            | Roche                                                     | 11697498001; N/A               |
| Quinacrine                             | Sigma Aldrich                                             | Q3251; 69-05-6                 |
| Salbutamol                             | Sigma Aldrich                                             | S8260; 18559-94-9              |
| Salmeterol                             | Tocris                                                    | 4712, 94749-08-3               |
| Siramesine                             | Gift from Christine Volbracht, H. Lundbeck A/S            | N/A, 163630-79-3               |
| SU11652                                | Enzo Life Sciences                                        | BML-EI408-0001, 326914-10-7    |
| Sunitinib malate                       | Selleck Chemicals                                         | S1042, 341031-54-7             |
| Terfenadine                            | Sigma Aldrich                                             | T9652, 50679-08-8              |
| Thapsigargin                           | Tocris                                                    | 1138, 67526-95-8               |
| Triton-X-100                           | Sigma Aldrich                                             | T9284; 9002-93-1               |
| Vinorelbine                            | Sigma Aldrich                                             | V2264; 125317-39-7             |
| Water, for LC-MS                       | VWR                                                       | BDH83545.400; N/A              |
| <b>Antibodies</b>                      |                                                           |                                |
|                                        | <b>Source</b>                                             | <b>Identifier</b>              |
| ADCY1                                  | Novus Biologicals                                         | NBP1-19628                     |
| Anti GFP                               | Abcam                                                     | ab290                          |
| Beta actin HRP-conjugated              | Abcam                                                     | ab20272                        |
| Cathepsin B                            | Ekkehard Weber, Martin Luther University Halle-Wittenberg | 3E4+6D5, PubMed PMID: 25205719 |
| CREB                                   | Cell Signaling Technology                                 | 9197                           |
| CREB, P-Ser133                         | Cell Signaling Technology                                 | 9198S                          |
| Galectin 3                             | Sigma Aldrich                                             | MABT51                         |
| GAPDH, HRP-conjugated                  | Thermo Fisher Scientific                                  | MA5-15738-HRP                  |
| HSP90                                  | BD Transduction Laboratories                              | 610418                         |
| Lamin B, HRP-conjugated                | Abcam                                                     | ab194109                       |
| LAMP1                                  | Developmental Studies Hybridoma Bank                      | clone H4A3                     |
| LAMP2                                  | Developmental Studies Hybridoma Bank                      | H4B4                           |
| P2RX4                                  | Alomone Labs                                              | APR-002                        |
| Mouse IgG (donkey)<br>Alexa Fluor 488  | Thermo Fisher Scientific                                  | A-21202                        |
| Mouse IgG (donkey)<br>Alexa Fluor 594  | Thermo Fisher Scientific                                  | A21203                         |
| Mouse IgG (rabbit)<br>HRP-conjugated   | Sigma Aldrich                                             | A9044-2ML                      |
| Rabbit IgG (donkey)<br>Alexa Fluor 488 | Thermo Fisher Scientific                                  | A-21206                        |
| Rabbit IgG (donkey)<br>Alexa Fluor 594 | Thermo Fisher Scientific                                  | A21207                         |
| Rabbit IgG (goat)<br>HRP-conjugated    | Vector Laboratories                                       | PI-1000                        |
| SERCA2                                 | Abcam                                                     | ab2817                         |
| <b>siRNA</b>                           |                                                           |                                |
|                                        | <b>Source</b>                                             | <b>Identifier</b>              |
| ADCY1#1                                | Sigma Aldrich                                             | SASI_Hs01_00226331             |

|                                                  |                               |                                                                    |
|--------------------------------------------------|-------------------------------|--------------------------------------------------------------------|
| ADCY1#2                                          | Sigma Aldrich                 | SASI_Hs01_00226332                                                 |
| ADCY1#3                                          | Sigma Aldrich                 | SASI_Hs01_00226330                                                 |
| All Star non-targeting control siRNA             | Qiagen                        | SI03650318                                                         |
| CALCR#1                                          | Sigma Aldrich                 | SASI_Hs01_00077738                                                 |
| CALCR#2                                          | Sigma Aldrich                 | SASI_Hs01_00077739                                                 |
| CALCR#3                                          | Sigma Aldrich                 | SASI_Hs01_00077740                                                 |
| CXCR4#1                                          | Sigma Aldrich                 | SASI_Hs01_00077740                                                 |
| CXCR4#2                                          | Sigma Aldrich                 | SASI_Hs01_00077738                                                 |
| CXCR4#3                                          | Sigma Aldrich                 | SASI_Hs01_00077739                                                 |
| GNAI#1                                           | Sigma Aldrich                 | SASI_Hs01_00199944                                                 |
| GNAI#2                                           | Sigma Aldrich                 | SASI_Hs01_00199945                                                 |
| GNAI#3                                           | Sigma Aldrich                 | SASI_Hs01_00199946                                                 |
| P2RX4                                            | Santa Cruz                    | sc-42569                                                           |
| <b>Primers</b>                                   | <b>Source</b>                 | <b>Identifier</b>                                                  |
| ADCY1                                            | Biomol                        | VHPS-168                                                           |
| <b>Plasmids</b>                                  | <b>Source</b>                 | <b>Identifier</b>                                                  |
| ADCY1-GFP                                        | OriGene                       | RG222738                                                           |
| Flamindo2                                        | A gift from Tetsuya Kitaguchi | Addgene plasmid # 73938                                            |
| LAMP1-mCherry                                    | A gift from Michael Davidson  | Addgene plasmid # 55073                                            |
| ML1-CGamp3                                       | A gift from Haoxing Xu        | Ref. 41, Shen et al., 2012                                         |
| P2X4-pHluorin123                                 | A gift from Baljit Khakh      | Addgene plasmid # 52926                                            |
| <b>KITS</b>                                      | <b>Source</b>                 | <b>Identifier</b>                                                  |
| HitHunter® cAMP XS+ cAMP assay Kit               | DiscoverX                     | 90-0075                                                            |
| Pierce BCA Protein Assay Kit                     | Thermo Fisher Scientific      | 23225                                                              |
| Venor® GeM Classic PCR kit                       | Minerva Biolabs               | 11-1100                                                            |
| <b>Deposited Data</b>                            | <b>Source</b>                 | <b>Identifier</b>                                                  |
| RNASeq: MCF7 control and MCF CAD resistant cells | GEO database, NCBI            | accession number to be provided before publication                 |
| <b>Software</b>                                  | <b>Source</b>                 | <b>Identifier</b>                                                  |
| CLC genomic workbench                            | Qiagen                        | www.qiagenbioinformatics.com                                       |
| FlowJo                                           | FLOWJO LLC                    | www.flowjo.com                                                     |
| ImageJ                                           | Fiji                          | www.imagej.net/Fiji                                                |
| MS Excel 2013                                    | Microsoft                     | www.products.office.com/en/excel                                   |
| Prism7                                           | GraphPad                      | www.graphpad.com/scientific-software/prism/                        |
| Zeiss Zen                                        | GraphPad                      | www.zeiss.com/microscopy/int/products/microscope-software/zen.html |
| <b>Cell culture</b>                              | <b>Source</b>                 | <b>Identifier</b>                                                  |

|                                                                                     |                                                       |                                          |
|-------------------------------------------------------------------------------------|-------------------------------------------------------|------------------------------------------|
| A549, non-small cell lung carcinoma (male)                                          | ATCC                                                  | ATCC <sup>®</sup> CCL-185 <sup>™</sup>   |
| Dulbecco's Modified Eagle's medium                                                  | Thermo Fisher Scientific                              | 31966-021                                |
| Dulbecco's phosphate-buffered saline (DPBS) with Ca <sup>2+</sup> /Mg <sup>2+</sup> | Thermo Fisher Scientific                              | 14040-117                                |
| Dulbecco's phosphate-buffered saline (DPBS) w/o Ca <sup>2+</sup> /Mg <sup>2+</sup>  | Thermo Fisher Scientific                              | 14190-094                                |
| HeLa, cervix carcinoma                                                              | ATCC                                                  | ATCC <sup>®</sup> CRM-CCL-2 <sup>™</sup> |
| Fetal calf serum                                                                    | Thermo Fisher Scientific                              | 10270-106                                |
| Live Cell Imaging Solution                                                          | Thermo Fisher Scientific                              | A14291DJ                                 |
| MCF7-S1, mammary adenocarcinoma (female)                                            | Marja Jäättelä, Danish Cancer Society Research Center | PubMed PMID: 7540278                     |
| Penicillin/Streptomycin                                                             | Life Technologies                                     | 11811-031                                |

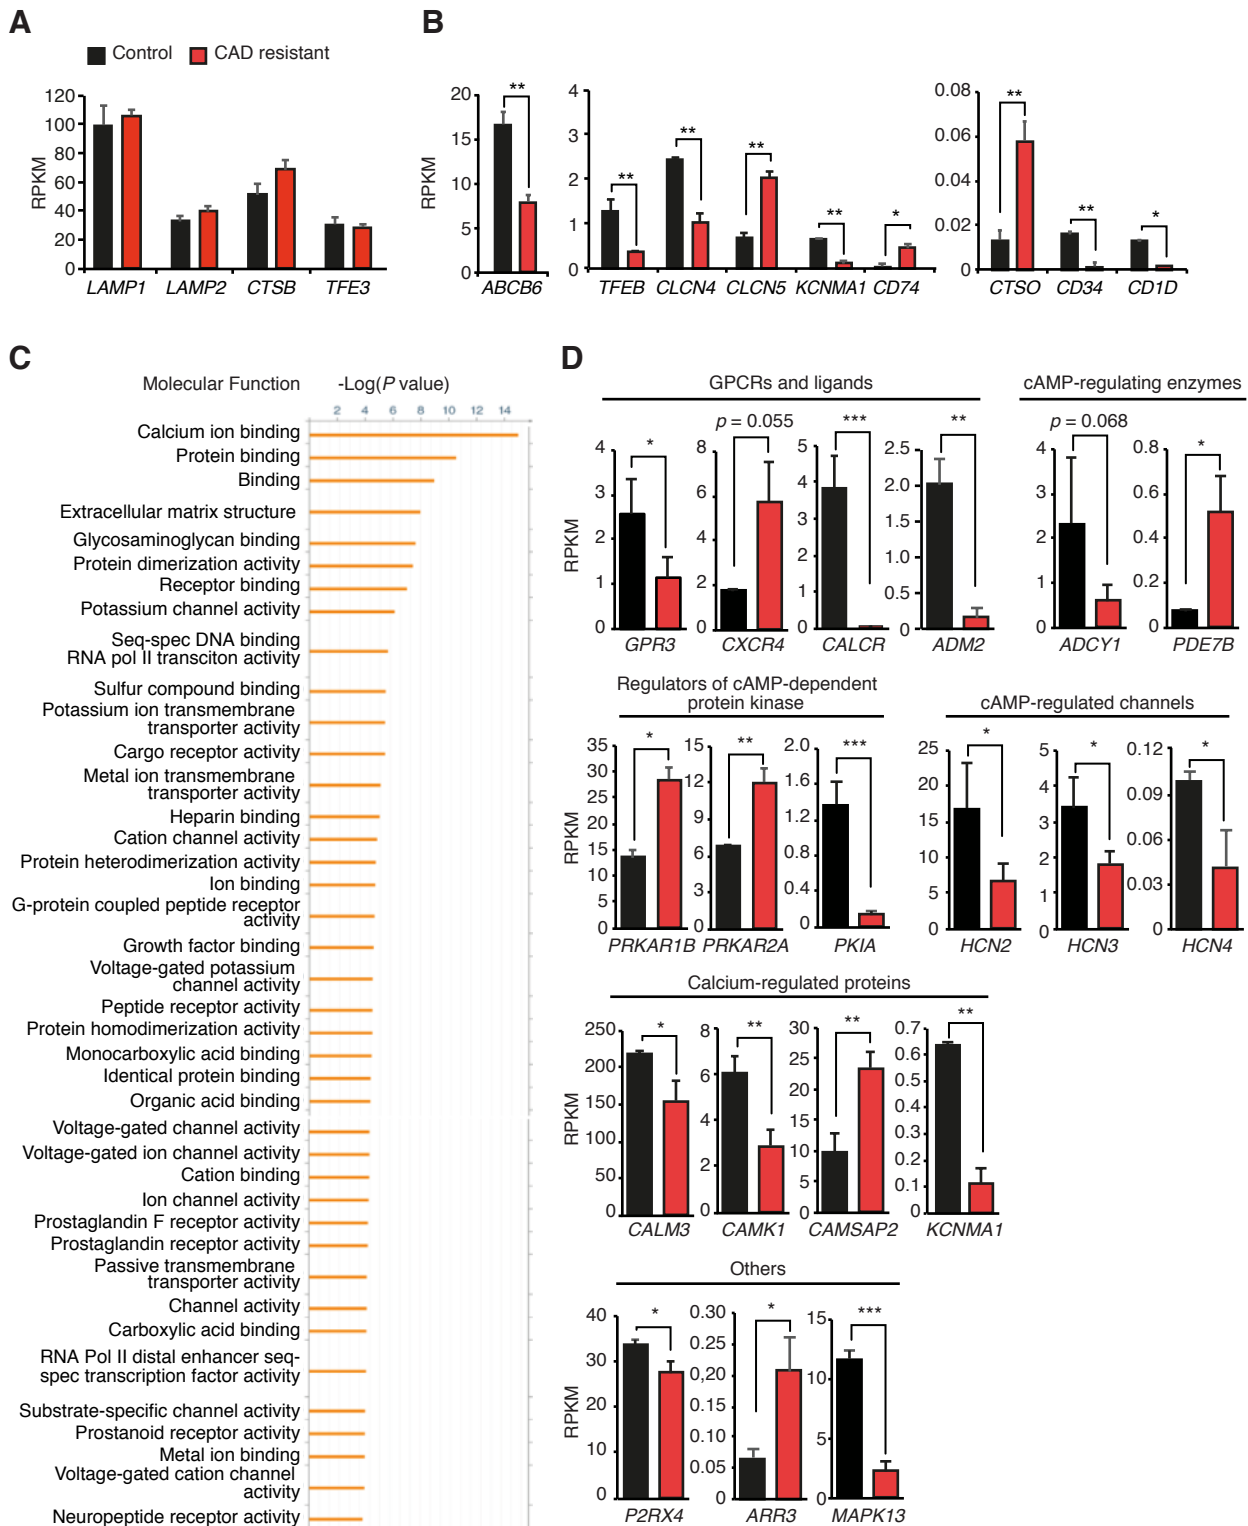

### Figure S1. CAD resistance is associated with altered gene expression

Gene expression in two independent pools of control and four independent pools of CAD resistant MCF7 cells as analyzed by whole transcriptome sequencing (RNASeq).

(A) Mean expression of indicated lysosome-related genes in control (black) and CAD resistant (red) cells.

(B) Expression levels of lysosome-related genes whose expression was significantly altered ( $\geq 2$ -fold;  $P \leq 0.05$ ) in control (black) and CAD resistant (red) cells.

(C) Gene ontology analysis comparing transcriptomes of control and CAD resistant cells performed by Metacore™ software ([https://portal.genego.com/cgi/data\\_manager.cgi](https://portal.genego.com/cgi/data_manager.cgi)).

(D) Mean expression of indicated genes related to GPCR signaling pathways in control (black) and CAD resistant (red) cells.

Error bars, SD of two control MCF7 pools and three or four CAD resistant MCF7 pools.

\*  $P < 0.05$ , \*\*  $P < 0.01$ , \*\*\*  $P < 0.001$  as analyzed by 2-tailed, homoscedastic student's t-test.

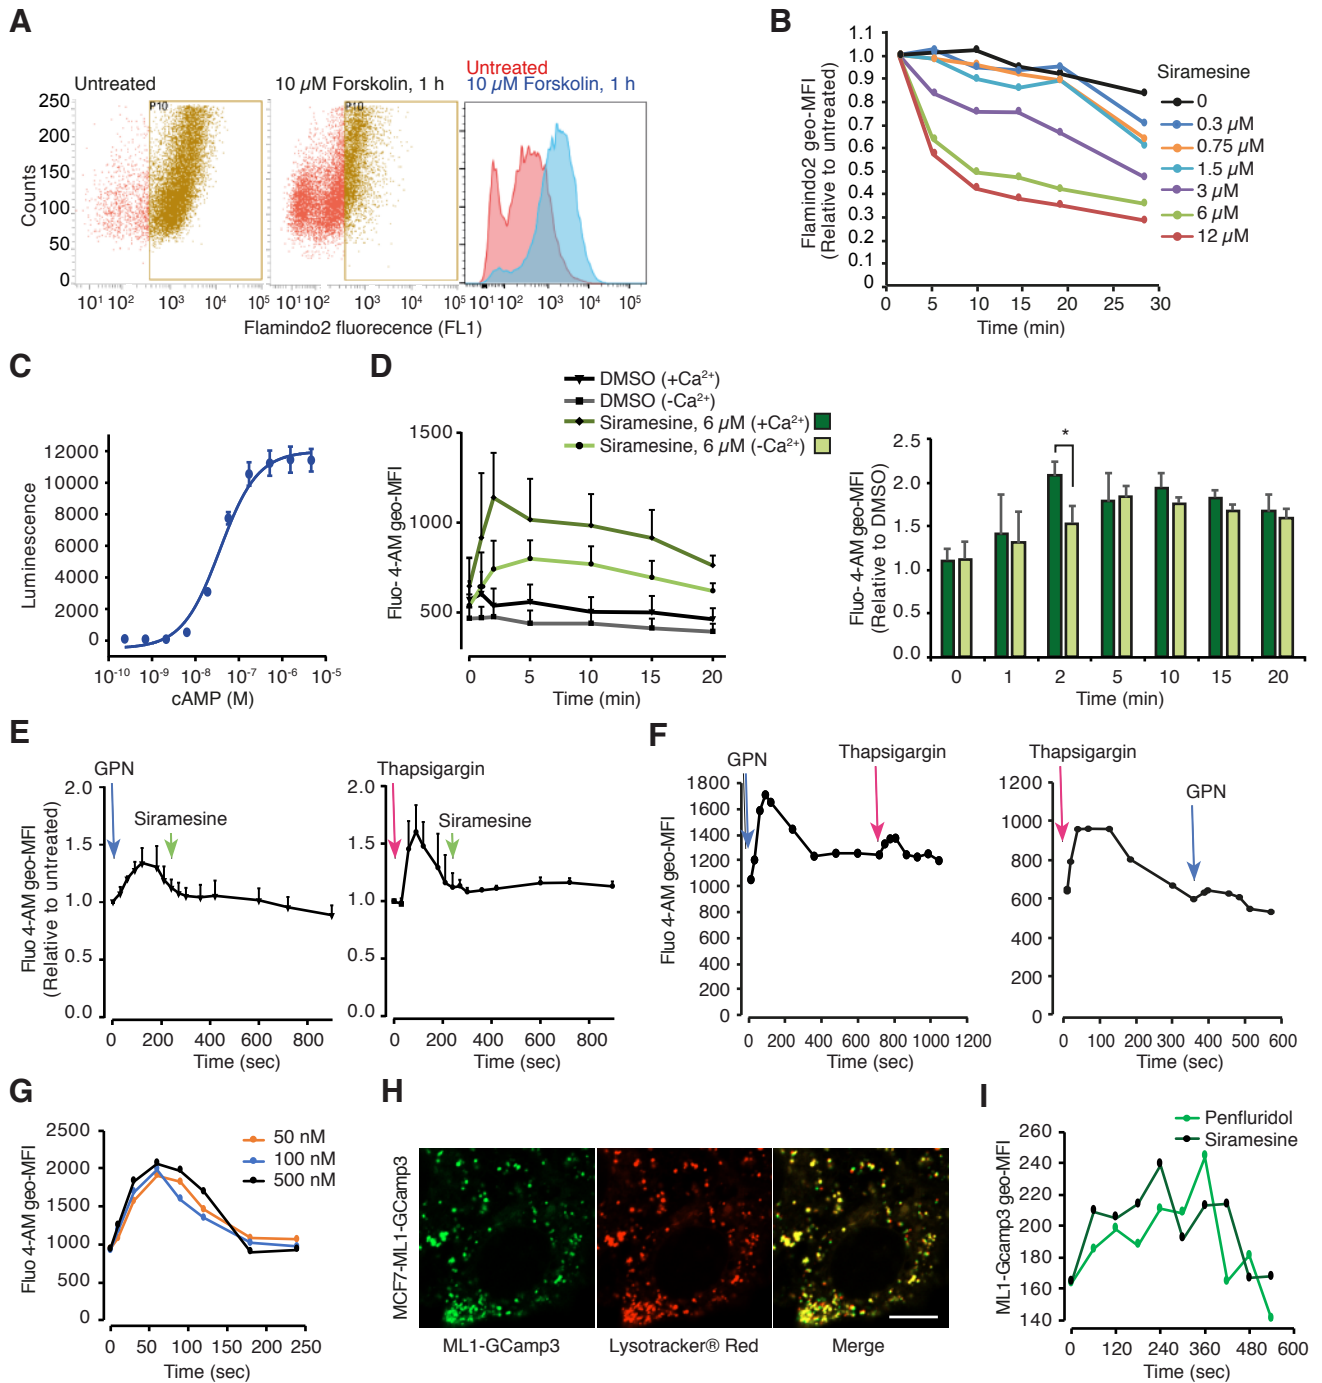

### Figure S2. CAD resistance is associated with reduced intracellular cAMP and Ca<sup>2+</sup> levels

(A) Representative flow cytometer profiles showing Flamindo2 fluorescence (FL1) in MCF7-Flamindo2 cells left untreated or treated with 10  $\mu$ M forskolin in the absence of extracellular Ca<sup>2+</sup> for 1 h.

(B) Geometric mean fluorescence intensities (geo-MFIs) of MCF7-Flamindo2 cells treated with indicated concentrations of siramesine in the absence of extracellular Ca<sup>2+</sup> for indicated times were analyzed by flow cytometry.

(C) Standard curve for intracellular cAMP measurements presented in Figure 3D.

(D) Actual (left) and normalized (right) Fluo-4-AM geo-MFIs reflecting free [Ca<sup>2+</sup>]<sub>i</sub> in MCF7 cells treated as indicated in the presence or absence of extracellular Ca<sup>2+</sup>.

(E) Normalized Fluo-4-AM geo-MFIs in MCF7 cells treated with 500  $\mu$ M GPN (left) or 500 nM thapsigargin (right) at 0 sec followed by 6  $\mu$ M siramesine at 240 sec in the absence of extracellular Ca<sup>2+</sup>.

(F) Fluo-4-AM geometric MFIs in MCF7 cells treated with 500  $\mu$ M GPN at 0 sec followed by 500 nM thapsigargin at 720 sec (left) or 500 nM thapsigargin at 0 sec followed by 500  $\mu$ M GPN at 360 sec (right) in the absence of extracellular Ca<sup>2+</sup>.

(G) Fluo-4-AM geo-MFIs of MCF7 cells treated with indicated concentrations of thapsigargin in the absence of extracellular Ca<sup>2+</sup>.

(H) Representative images of MCF7 cells transfected with ML1-Gcamp3 for 72 h and loaded with LysoTracker® Red for 16 h followed by a 4 h chase in the absence of LysoTracker® Red 52 h after the transfection. Scale bar, 10  $\mu$ M.

(I) ML1-Gcamp3 geo-MFIs in HeLa cells transfected with ML1-Gcamp3 72 h prior to the treatment with 10  $\mu$ M penfluridol or siramesine in the absence of extracellular Ca<sup>2+</sup>.

Error bars, SD of  $\geq$  3 independent experiments.

\* P < 0.05 as analyzed by 2-tailed, homoscedastic student's t-test.

**A**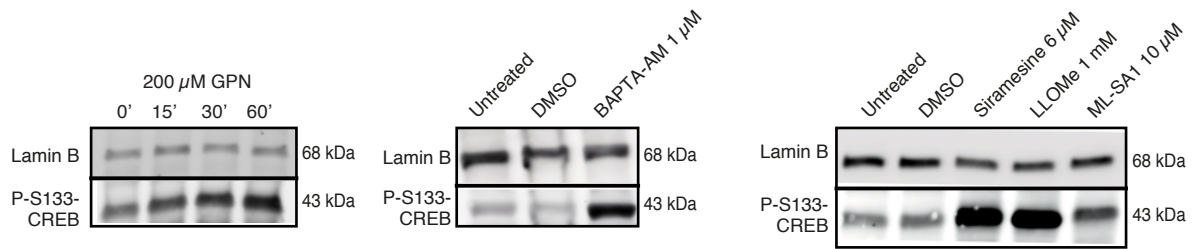**B**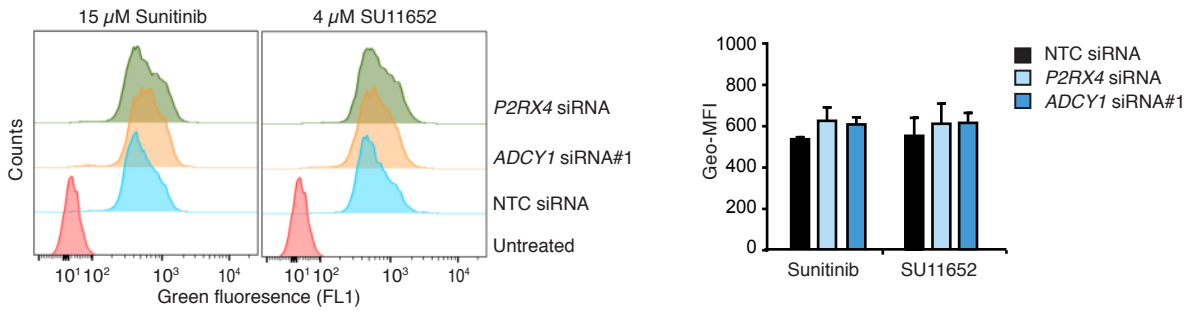**C**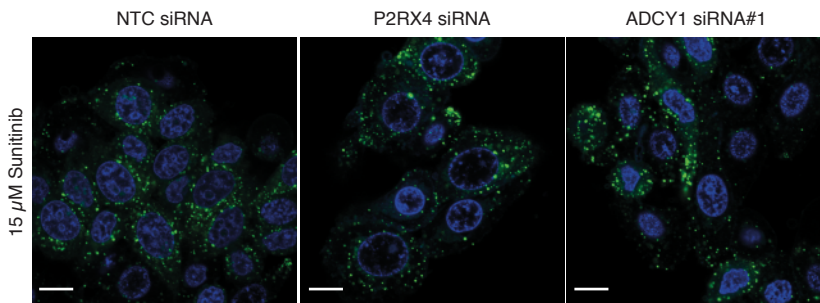**D**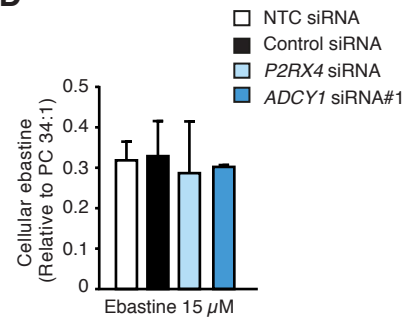**Figure S3. Ca<sup>2+</sup>-induced CREB phosphorylation (A) and CAD uptake in siRNA treated MCF7 cells (B-D)**

(A) Representative immunoblots of P-S133-CREB and Lamin B (loading control) in lysates of MCF7 cells treated as indicated for indicated times (left) or for 2 h (middle and right)

(B) Representative flow cytometry profiles (left) and quantification of geometric MFIs (right) in MCF7 cells treated with indicated siRNAs for 48 h and with 15  $\mu$ M sunitinib or 4  $\mu$ M SU11652 for the last 2 h. Untreated cells serve as a negative control.

(C) Representative confocal images of MCF7 cells treated with indicated siRNAs for 48 h and with 15  $\mu$ M sunitinib for the last 2 h. Images were taken with 63x magnification using Zeiss LSM700 confocal microscope. The optimal slice thickness (approximately 350 nm) was defined by the Zeiss zen software. Scale bar, 10  $\mu$ m.

(D) Ebastine levels in lipid extracts of MCF7 cells treated with indicated siRNAs for 48 h and with 15  $\mu$ M ebastine for the last 2 h were determined by mass spectrometry. The values are presented relative to phosphatidylcholine (PC) 34:1.

Error bars, SD of 3 independent experiments.



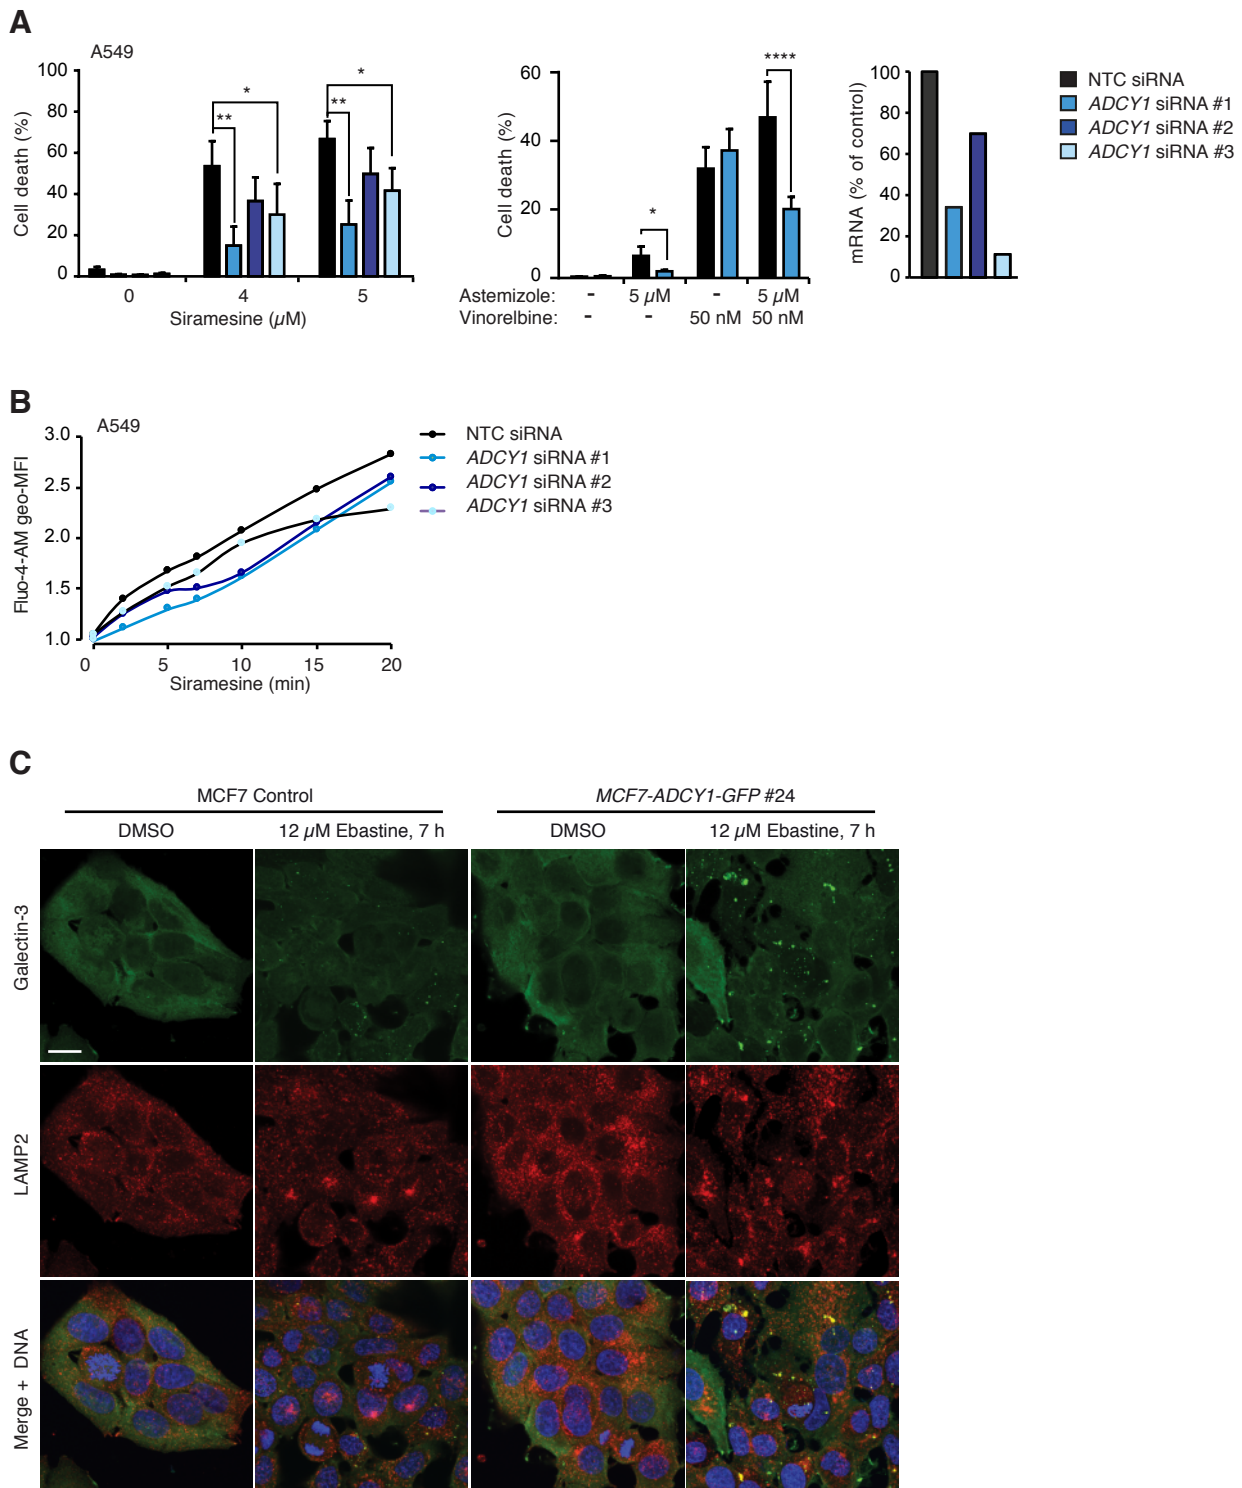

**Figure S4. ADCY1 mediates CAD-induced cAMP response and cell death**

(A) Cell death of A549 cells treated with indicated siRNAs for 72 h and with indicated concentrations of drugs for the last 48 h (left). Error bars, SD of  $\geq 3$  independent experiments. \*  $P < 0.05$ , \*\*  $P < 0.01$ , \*\*\*\*  $P < 0.0001$  as analyzed by 2-tailed, homoscedastic student's t-test. The efficacy of siRNAs was analyzed by qPCR (right).

(B) Fluo-4-AM geometric MFIs in A549 cells treated with indicated siRNAs for 72 h and with 10  $\mu\text{M}$  siramesine for the last 20 min.

(C) Representative confocal images of MCF7-ADCY1-GFP #24 cells stained with LysoTracker® Red and Hoechst 33342. Images were taken with 63x magnification using Zeiss LSM700 confocal microscope. The optimal slice thickness (approximately 350 nm) was defined by the Zeiss zen software.

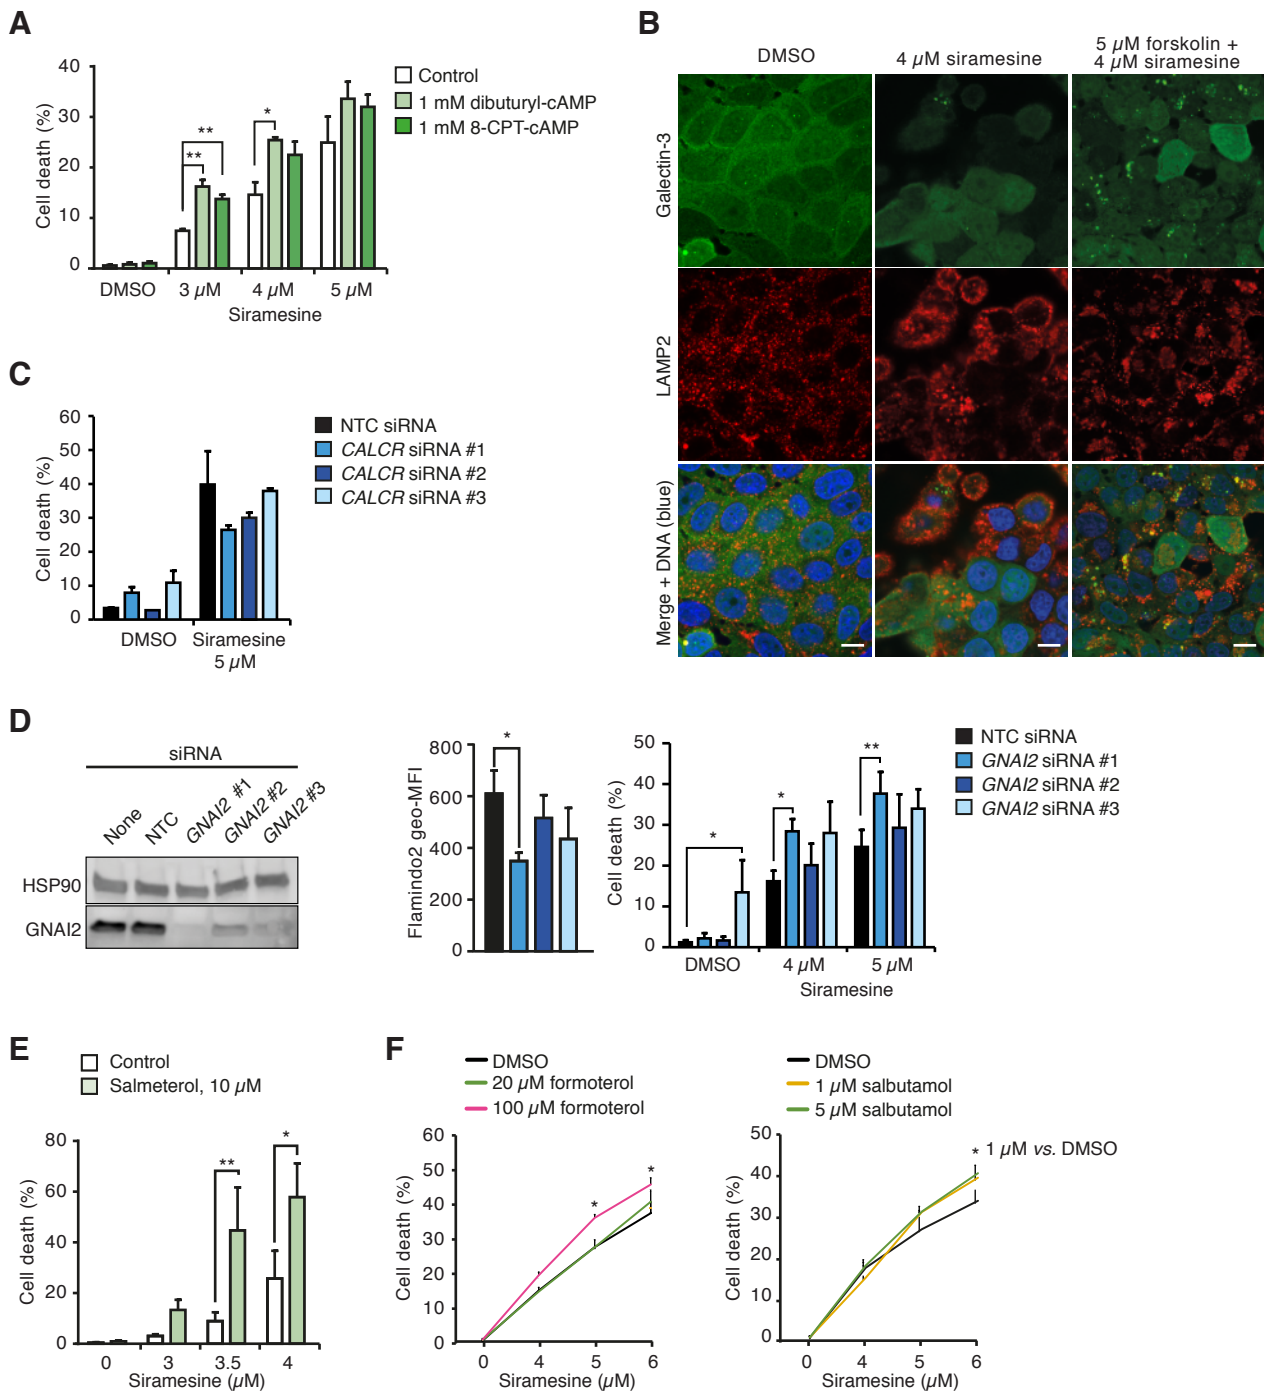

**Figure S5. cAMP inducers sensitize cancer cells to CAD-induced cytotoxicity**

(A) Cell death of MCF7 cells treated as indicated for 48 h.

(B) Representative confocal images of MCF cells treated as indicated for 16 h and stained for galectin-3 and LAMP2.

Scale bar, 10 μm. Images were taken with 63x magnification using Zeiss LSM700 confocal microscope. The optimal slice thickness (approximately 350 nm) was defined by the Zeiss zen software.

(C) Death of MCF7 cells transfected with NTC or CALCR siRNAs for 72 h, and treated as indicated for the last 48 h.

(D) Representative immunoblot of indicated proteins (left), Flamindo2 geometric MFIs (middle) and cell death (right) of MCF7-Flamindo2 cells treated with NTC or GNAI2 siRNAs for 72 h. For cell death measurements, cells were treated with indicated concentrations of siramesine for the last 48 h.

(E and F) Death of A549 (E) and MCF7 (F) cells treated as indicated for 48 h.

Error bars, SD of three independent experiments. \* P < 0.05, \*\* P < 0.01 as analyzed by 2-tailed, homoscedastic student's t-test.

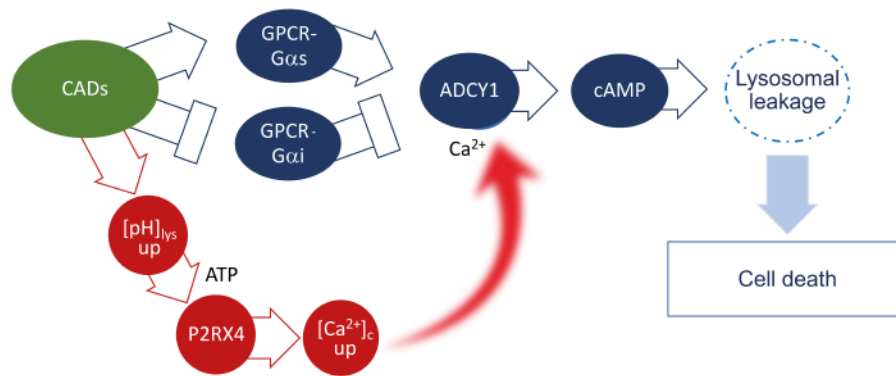

**Figure S6. Schematic presentation of CAD-induced signaling that promotes lysosome-dependent cell death**

The accumulation of CADs in lysosomes increases lysosomal pH, which results in the ATP-mediated activation of P2RX4 and lysosomal Ca<sup>2+</sup> release. Ca<sup>2+</sup> enhances the ADCY1-dependent synthesis of cAMP, which is essential for the CAD-induced lysosomal membrane permeabilization and lysosome-dependent cell death.
